# Supplementary material for: Determinants of Anti-S Immune Response at 9 Months after COVID-19 Vaccination in a Multicentric European Cohort of Healthcare Workers—ORCHESTRA Project
Source: MDPI journal article supplement (doi:10.3390/v14122657), 2022-11-28
Supplement: s1 [file s1]

**Supplementary Table 1.** Mean of crude serology test results, stratified by cohort

| <b>Cohorts</b>                  | <b>Crude result: Mean (SE)*</b> | <b>Assay, sampling type</b>                                                                                                                 |
|---------------------------------|---------------------------------|---------------------------------------------------------------------------------------------------------------------------------------------|
| Italy-Bologna                   | 979.06 (19.29)                  | Ab anti SARS CoV-2 S (RBD) IgG ECLIA                                                                                                        |
| Italy-Brescia                   | 1670.41 (27.97)                 | ECLIA Elecsys® anti SARS CoV2 S for anti-SARS-CoV-2-S total antibody detection (Roche Diagnostics International Ltd, Rotkreuz, Switzerland) |
| Italy-Trieste                   | 2394.19 (119.88)                | CMIA anti S1-RBD                                                                                                                            |
| Italy-Verona                    | 745.12 (31.05)                  | CLIA trimeric S IgG                                                                                                                         |
| Germany-Munich                  | 52.31 (2.95)‡                   | Roche Elecsys Anti-SARS-CoV-2 anti S1 (Roche, Mannheim, Germany)                                                                            |
| Slovakia-Multicentre            | 504.46 (27.18)                  | QuantiVac ELISA (IgG) EUROIMMUN                                                                                                             |
| Spain-Northern Barcelona region | 1685.16 (122.48)                | DECOV1901 ELISA (IgG-S)                                                                                                                     |
| Spain-Oviedo                    | 606.96 (55.64)                  | COVID 19 IGG CLIA                                                                                                                           |

Notes: All the serology samples were obtained from venous blood, except from Munich cohort, where samples were collected from capillary blood.

\* Results adjusted by age.

‡Sample obtained from capillary blood.

**Supplementary Table 2:** Relative risk of an increase of one SD in standardized log anti-S level – results of multivariate analysis including job title

| <b>Variables</b>                                        | <b>RR</b> | <b>95% CI</b> |
|---------------------------------------------------------|-----------|---------------|
| <b>Cohorts</b>                                          |           |               |
| Italy-Bologna                                           | ref       |               |
| Italy-Brescia                                           | 0.43      | 0.42-0.45     |
| Italy-Trieste                                           | 0.61      | 0.57-0.64     |
| Italy-Verona                                            | 0.74      | 0.70-0.78     |
| Slovakia-Multicentre                                    | 0.40      | 0.37-0.44     |
| Spain-Barcelona                                         | 0.21      | 0.19-0.23     |
| Spain-Oviedo                                            | 0.30      | 0.25-0.35     |
| <b>Sex</b>                                              |           |               |
| Male                                                    | ref       |               |
| Female                                                  | 1.07      | 1.03-1.10     |
| <b>Age group</b>                                        |           |               |
| 10 years increase                                       | 0.88      | 0.87-0.89     |
| <b>Job title</b>                                        |           |               |
| Administration                                          | ref       |               |
| Technician                                              | 1.05      | 0.98-1.12     |
| Nurse                                                   | 0.99      | 0.94-1.05     |
| Physician (Including residents)                         | 1.03      | 0.97-1.08     |
| Other HCW (including auxiliary workers)                 | 0.96      | 0.91-1.02     |
| <b>Days since last vaccine dose to 9-month serology</b> |           |               |
| 10 days increase                                        | 0.98      | 0.97-0.99     |
| <b>Previous Covid-19 infection (detection: PCR)</b>     |           |               |
| Never infected                                          | ref       |               |
| Infected at least once                                  | 2.96      | 2.86-3.07     |
| <b>Number of doses</b>                                  |           |               |
| 1 dose received                                         | ref       |               |
| 2 doses received                                        | 1.25      | 1.10-1.42     |
| <b>Type of vaccine received</b>                         |           |               |
| Pfizer                                                  | ref       |               |
| Moderna                                                 | 1.72      | 1.53-1.93     |
| AstraZeneca                                             | 0.64      | 0.40-1.04     |
| Mixed vaccines                                          | 1.48      | 0.93-2.36     |

RR, relative risk, adjusted by cohort, sex, age group, days since last vaccine dose to 9-month serology, number of doses, type of vaccine received; CI, confidence interval; ref, reference category



**Supplementary Table 3.** Relative risk of an increase of one SD in standardized log anti-S level, stratified by type of serologic assay

| Variables                                                                | RBD-based CLIA (N=9,623) |           | Other CLIA/ELISA (N=10,593) |           |
|--------------------------------------------------------------------------|--------------------------|-----------|-----------------------------|-----------|
|                                                                          | RR                       | 95% CI    | RR                          | 95% CI    |
| <b>Sex</b>                                                               |                          |           |                             |           |
| Male                                                                     | ref                      |           | ref                         |           |
| Female                                                                   | 1.05                     | 1.01-1.09 | 1.07                        | 1.03-1.11 |
| <b>Age group</b>                                                         | -                        |           | ref                         |           |
| 10 years increase                                                        | 0.87                     | 0.85-0.88 | 0.87                        | 0.86-0.88 |
| <b>Days since last vaccine dose to 9-month serology</b>                  | -                        |           | -                           |           |
| 10 days increase                                                         | 0.98                     | 0.97-0.98 | 0.96                        | 0.95-0.97 |
| <b>Previous Covid-19 infection (detection: PCR/ antiN serology test)</b> |                          |           |                             |           |
| Never infected                                                           | ref                      |           | ref                         |           |
| Infected at least once                                                   | 2.68                     | 2.52-2.86 | 3.19                        | 3.06-3.32 |
| <b>Number of doses</b>                                                   |                          |           |                             |           |
| 1 dose received                                                          | ref                      |           | ref                         |           |
| 2 doses received                                                         | 1.09                     | 0.91-1.32 | 1.24                        | 1.08-1.42 |
| <b>Type of vaccine received</b>                                          |                          |           |                             |           |
| Pfizer                                                                   | ref                      |           | ref                         |           |
| Moderna                                                                  | 1.55                     | 1.42-1.70 | 1.32                        | 1.07-1.64 |
| AstraZeneca                                                              | 0.54                     | 0.41-0.72 | 0.71                        | 0.39-1.28 |
| Mixed vaccines                                                           | 1.32                     | 1.10-1.60 | 1.17                        | 0.78-1.77 |

RR, relative risk, adjusted by cohort, sex, age group, days since last vaccine dose to 9-month serology, number of doses, type of vaccine received; CI, confidence interval; ref, reference category
